# Supplementary material for: Water-Assisted Perovskite Quantum Dots with High Optical Properties
Source: MDPI journal article supplement (doi:10.3390/technologies10010011), 2022-01-17
Supplement: s1 [file s1]

## Supporting Information

# Water-assisted Perovskite Quantum Dots with High Optical Properties

Masaaki Yokoyama<sup>1</sup>, Ryota Sato<sup>1</sup>, Junya Enomoto<sup>1</sup>, Naoaki Oshita<sup>1</sup>, Taisei Kimura<sup>1</sup>, Keisuke Kikuchi<sup>1</sup>, Satoshi Asakura<sup>2</sup>, Kazuki Umemoto<sup>1</sup>, and Akito Masuhara<sup>1,3\*</sup>

<sup>1</sup> Graduate School of Science and Engineering, Yamagata University, 4-3-16  
Jonan, Yonezawa, Yamagata 992-8510, Japan

<sup>2</sup> Ise Chemical Corporation, 1-3-1 Kyobashi, Chuo-ku, Tokyo, 104-0031,  
Japan

<sup>3</sup> Frontier Center for Organic Materials (FROM), Yamagata University, 4-3-16  
Jonan Yonezawa, Yamagata 992-8510, Japan

\* Correspondence: masuhara@yz.yamagata-u.ac.jp

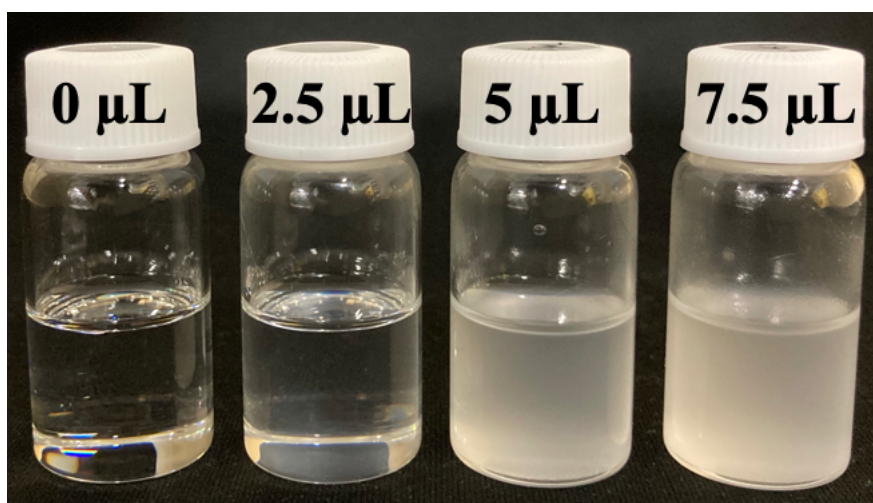

Figure S1. Photographs of mixed solvent of toluene and water.

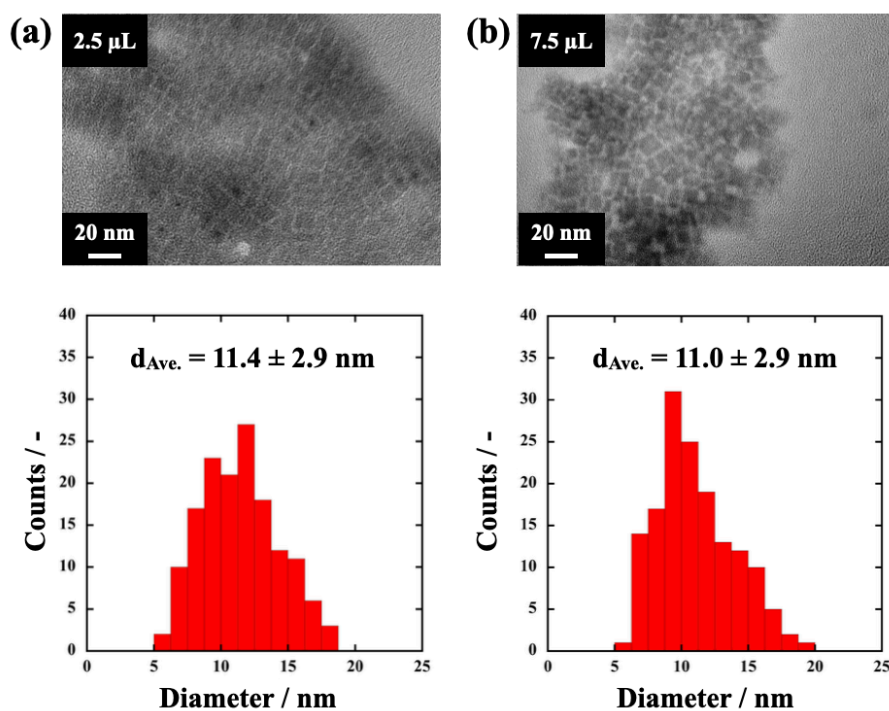

Figure S2. TEM images and size histogram of the MAPbBr<sub>3</sub> PeQDs prepared with (a) 2.5  $\mu\text{L}$  and (b) 7.5  $\mu\text{L}$  of water.

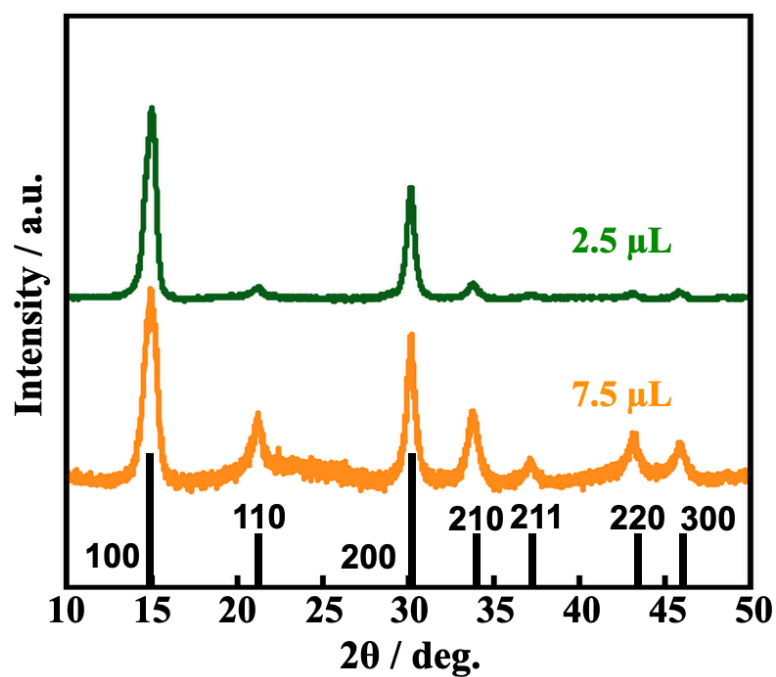

Figure S3. XRD patterns of the MAPbBr<sub>3</sub> PeQDs prepared with (a) 2.5  $\mu$ L and (b) 7.5  $\mu$ L of water.

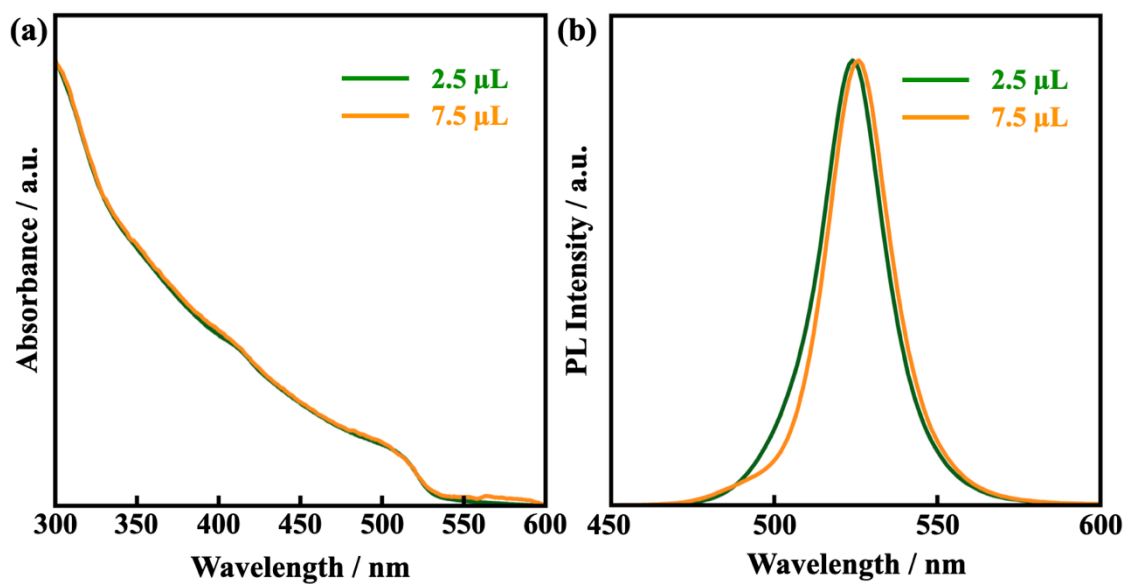

Figure S4. a) UV-vis absorption spectra and (b) PL spectra of the MAPbBr<sub>3</sub> PeQDs prepared with 2.5  $\mu$ L and 7.5  $\mu$ L of water.

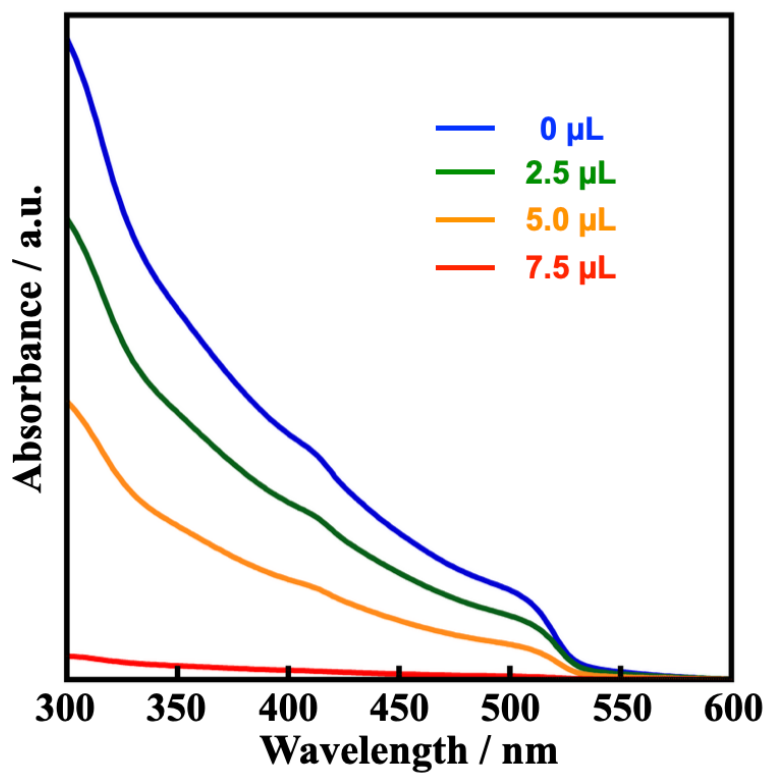

Figure S5. UV-vis absorption spectra of the MAPbBr<sub>3</sub> PeQDs prepared without water (0 μL) and with water (2.5 - 7.5 μL).

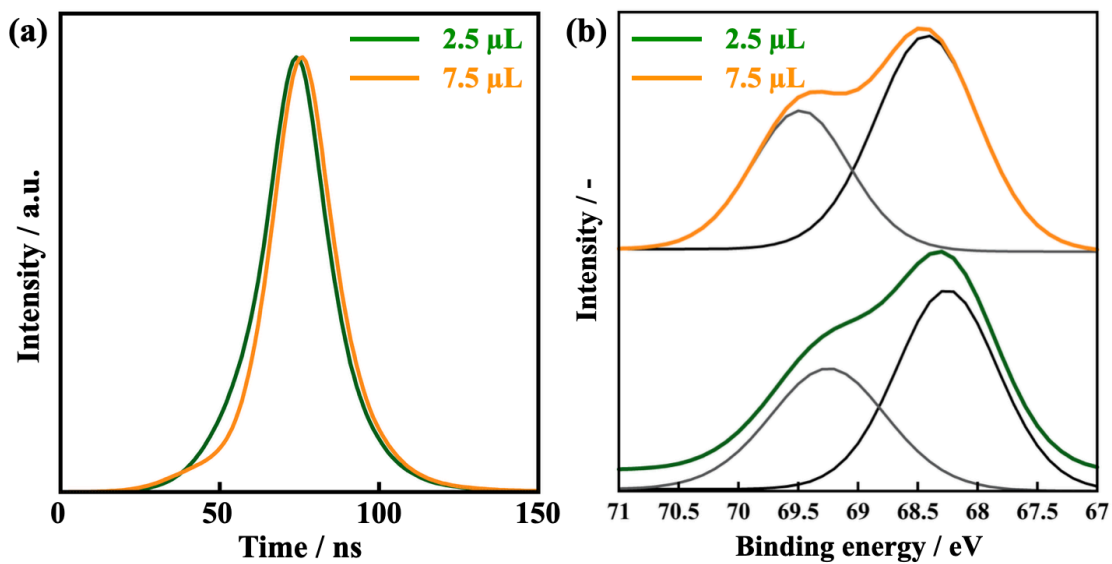

Figure S6. (a) PL decay curved and (b) XPS spectra of the MAPbBr<sub>3</sub> PeQDs prepared with 2.5 μL and 7.5 μL of water.
