# Supplementary material for: Water-Assisted Perovskite Quantum Dots with High Optical Properties
Source: MDPI journal article supplement (doi:10.3390/technologies10010011), 2022-01-17
Supplement: s1 [file s1]

Archive with 1 entries (1 files):
- technologies-1550454-supplementary.pdf
